# Supplementary material for: Perovskite nanocrystals passivated by aromatic phosphonic acid for high-performance light-emitting diodes
Source: Royal Society of Chemistry journal article supplement (doi:10.1039/d4tc02419b), 2024-01-01
Supplement: d4tc02419b1.pdf [file d4tc02419b1.pdf]

## Supporting Information

### Perovskite Nanocrystals Passivated by Aromatics Phosphonic Acid for High-performance Light-Emitting Diodes

Muhammad Imran Saleem, <sup>†a</sup> Siwei He, <sup>†b</sup> Seung Hyun Kim, <sup>a,c</sup> Jae-Wook Kang, <sup>\*b</sup> and Jeong-Hwan Lee <sup>\*a,c</sup>

<sup>a</sup> Department of Materials Science and Engineering, Inha University, Incheon 22212, Republic of Korea

<sup>b</sup> Department of Flexible and Printable Electronics LANL-JBNU Engineering Institute-Korea Jeonbuk National University Jeonju 54896, Republic of Korea

<sup>c</sup> Program in Semiconductor Convergence, Inha University, Incheon 22212, Republic of Korea

\*To whom correspondence should be addressed:

Email: [Jeong-hwan.lee@inha.ac.kr](mailto:Jeong-hwan.lee@inha.ac.kr) (J.-H. Lee), [jwkang@jbnu.ac.kr](mailto:jwkang@jbnu.ac.kr) (J.-W. Kang)

#### List of Figures

**Fig. S1** High-resolution TEM images of pristine and BPA-passivated FAPbBr<sub>3</sub> NCs (50 nm, 100 nm): pristine (a-b), 0.5 mg (c-d), 1 mg (e-f), and 1.5 mg BPA-passivated FAPbBr<sub>3</sub> NCs (g-h).

**Fig. S2** FT-IR Spectra of pristine and BPA-passivated FAPbBr<sub>3</sub> NCs.

**Fig. S3** Absorption spectra of Pristine and BPA-passivated FAPbBr<sub>3</sub> NCs.

**Fig. S4** Photographs of FAPbBr<sub>3</sub> NCs under ambient and UV light at the different test times.

**Fig. S5** Photographs of pristine and BPA-passivated FAPbBr<sub>3</sub> NCs after storage in refrigeration for 14 days. After Storage for 14 days in refrigeration, large aggregates appear in pristine NCs, while there is no aggregation in BPA-passivation FAPbBr<sub>3</sub> NCs.

**Fig. S6** Photographs of pristine and BPA (1 mg) passivated FAPbBr<sub>3</sub> NC films under the illumination of a UV lamp for 0 and 5 minutes.

**Fig. S7** XPS survey of pristine and BPA-passivated FAPbBr<sub>3</sub> NCs.

**Fig. S8** (a-b) The P 2p peaks of pristine and BPA-passivated FAPbBr<sub>3</sub> NCs film.

**Fig. S9** (a-b) The formation of a novel Pb–O–P covalent bond in BPA-passivated FAPbBr<sub>3</sub> NCs.

**Fig. S10** Commission Internationale de l'Éclairage (CIE) coordinates (0.19, 0.76) of PeLEDs.

**Fig. S11** EL spectra vs. different applied voltage of PeLEDs.

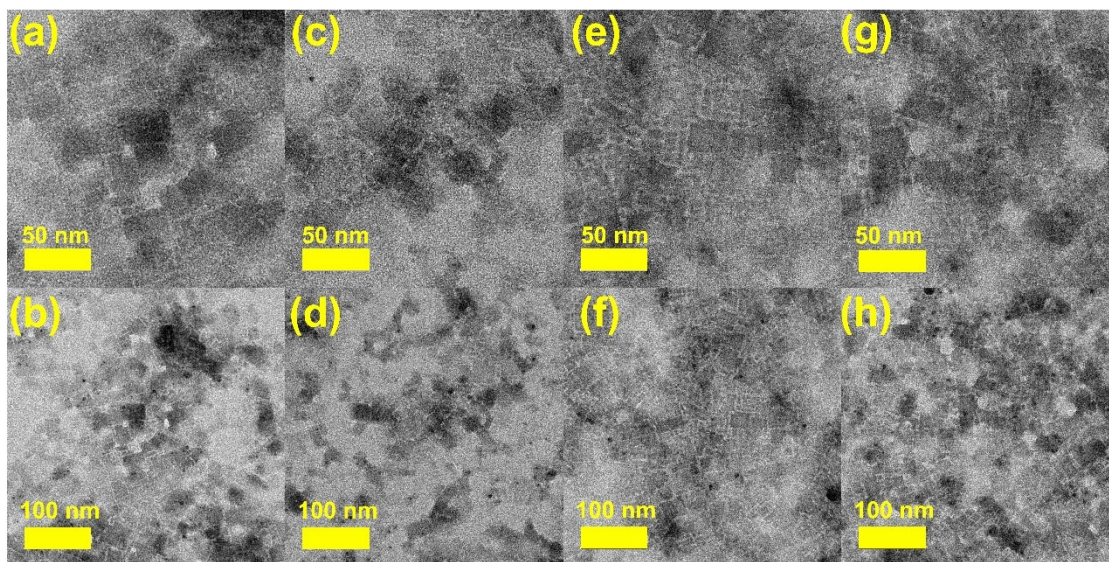

**Fig. S1** High-resolution TEM images of pristine and BPA-passivated FAPbBr<sub>3</sub> NCs (50 nm, 100 nm): pristine (a-b), 0.5 mg (c-d), 1 mg (e-f), and 1.5 mg BPA-passivated FAPbBr<sub>3</sub> NCs (g-h).

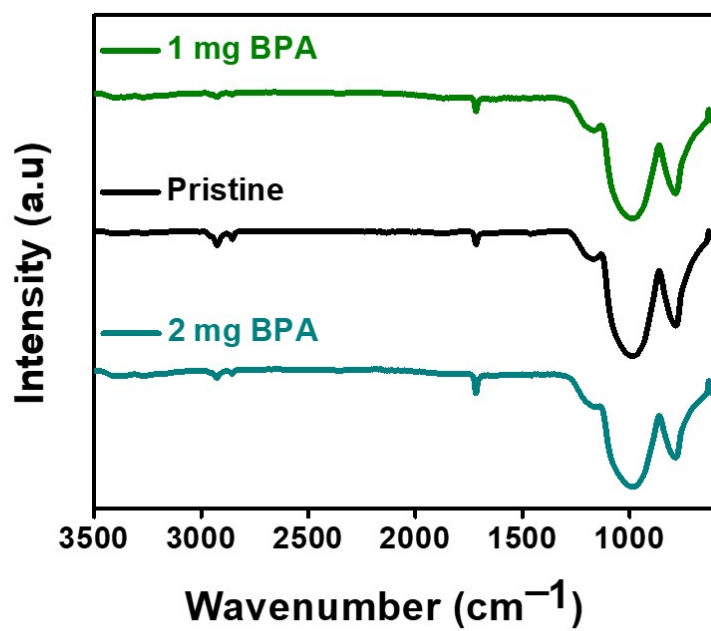

**Fig. S2** FT-IR spectra of pristine and BPA-passivated FAPbBr<sub>3</sub> NC films.

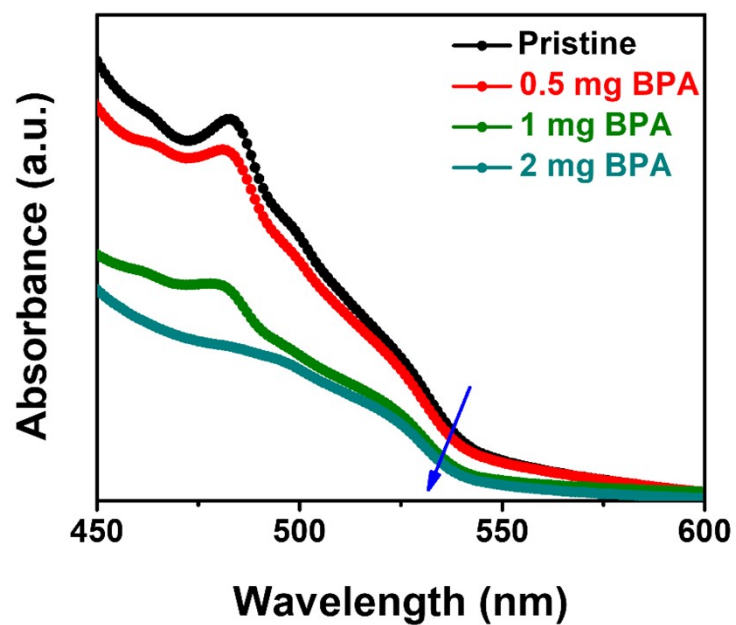

Fig. S3 Absorption spectra of Pristine and BPA-passivated FAPbBr<sub>3</sub> NCs.

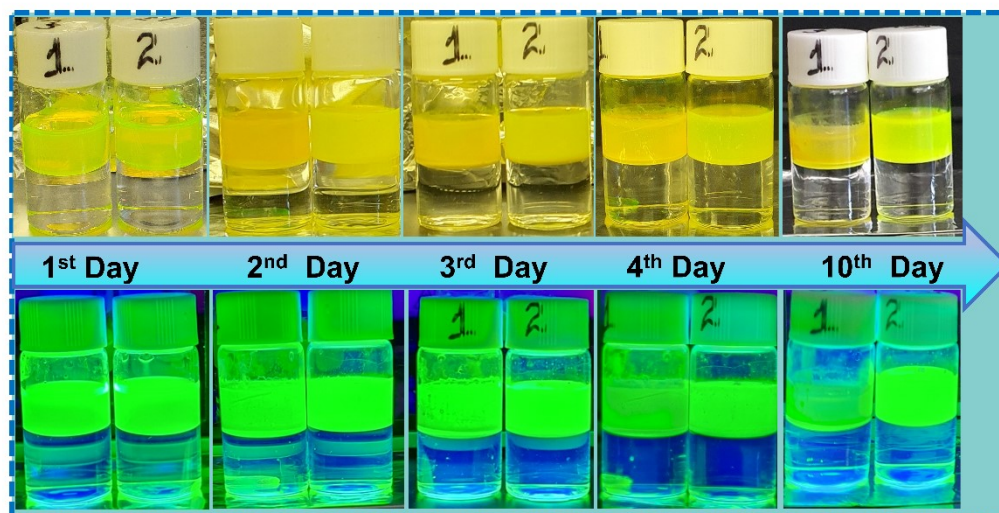

Fig. S4 Photographs of FAPbBr<sub>3</sub> NCs under room light and UV light at the different test times.

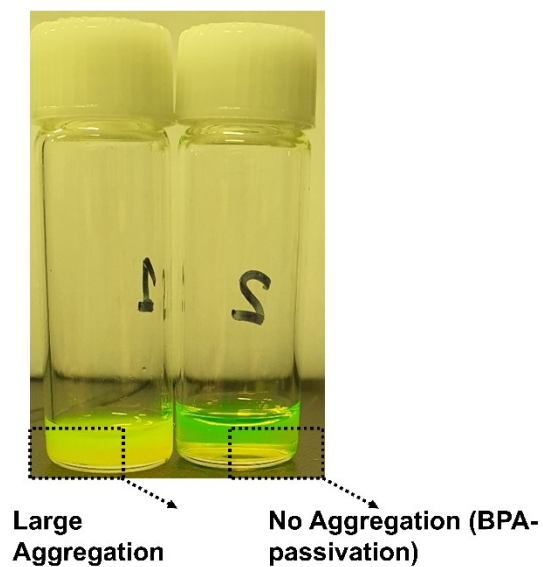

**Fig. S5** Photographs of pristine and BPA-passivated FAPbBr<sub>3</sub> NCs after storage in refrigeration for 14 days. After Storage for 14 days in refrigeration, large aggregates appear in pristine NCs, while there is no aggregation in BPA-passivation FAPbBr<sub>3</sub> NCs.

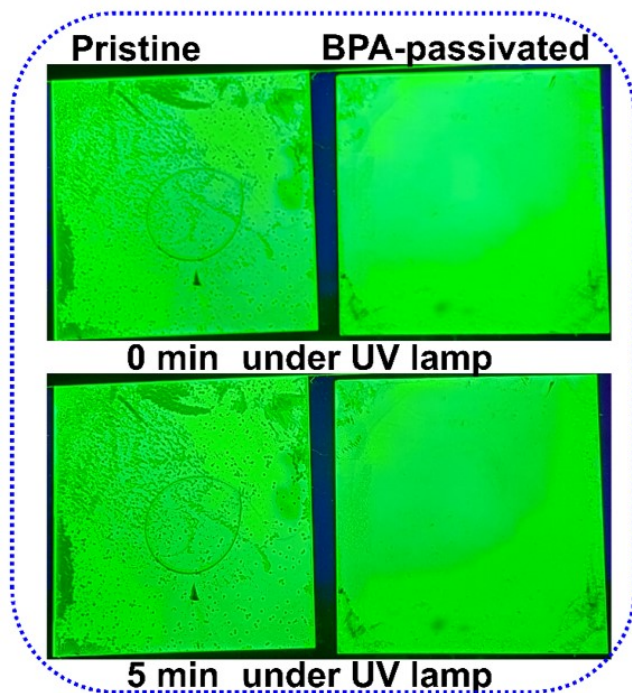

**Fig. S6** Photographs of pristine and BPA (1 mg) passivated FAPbBr<sub>3</sub> NC films under the illumination of a UV lamp for 0 and 5 minutes.

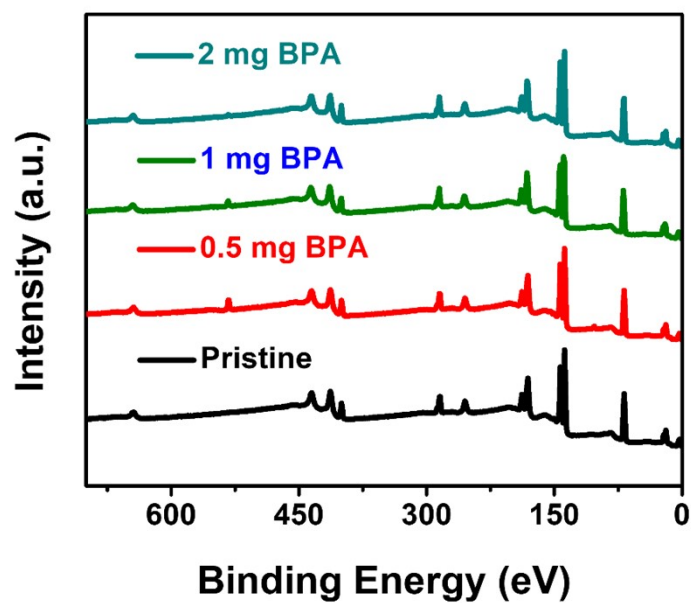

Fig. S7 XPS survey of pristine and BPA-passivated FAPbBr<sub>3</sub> NCs.

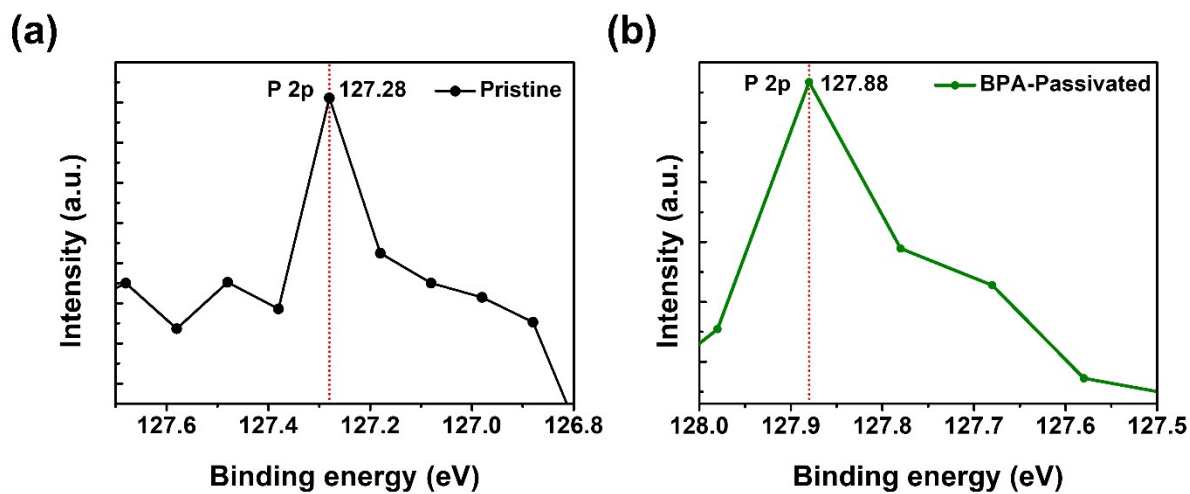

Fig. S8 (a-b) The P 2p peaks of pristine and BPA-passivated FAPbBr<sub>3</sub> NCs film.

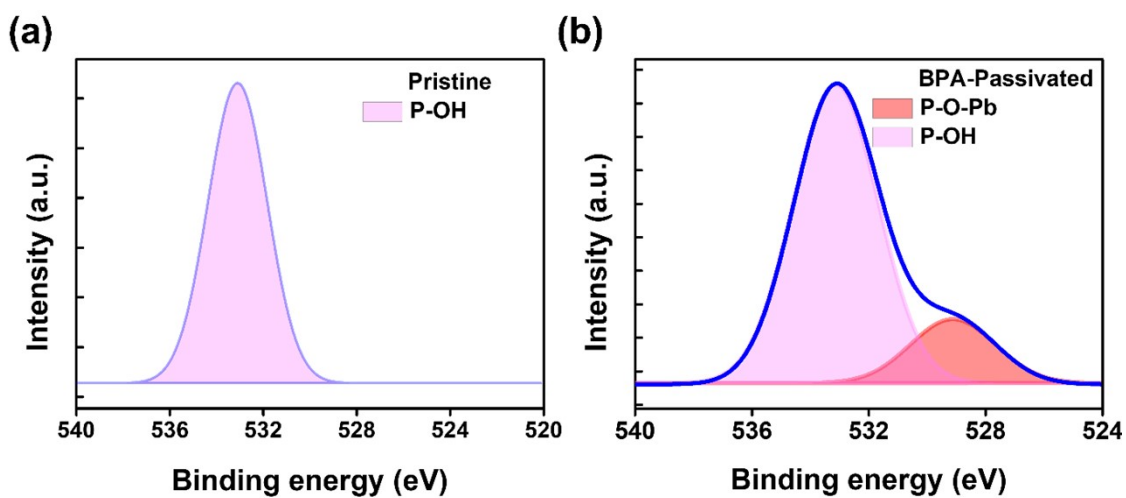

Fig. S9 (a-b). The formation of a novel Pb–O–P covalent bond in BPA-passivated FAPbBr<sub>3</sub> NCs.

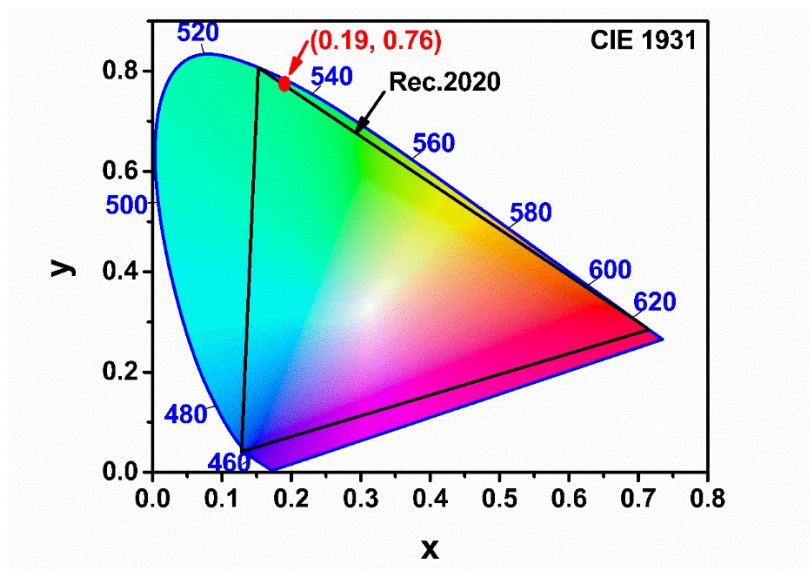

Fig. S10 Commission Internationale de l'Éclairage (CIE) coordinates (0.19, 0.76) of PeLEDs.

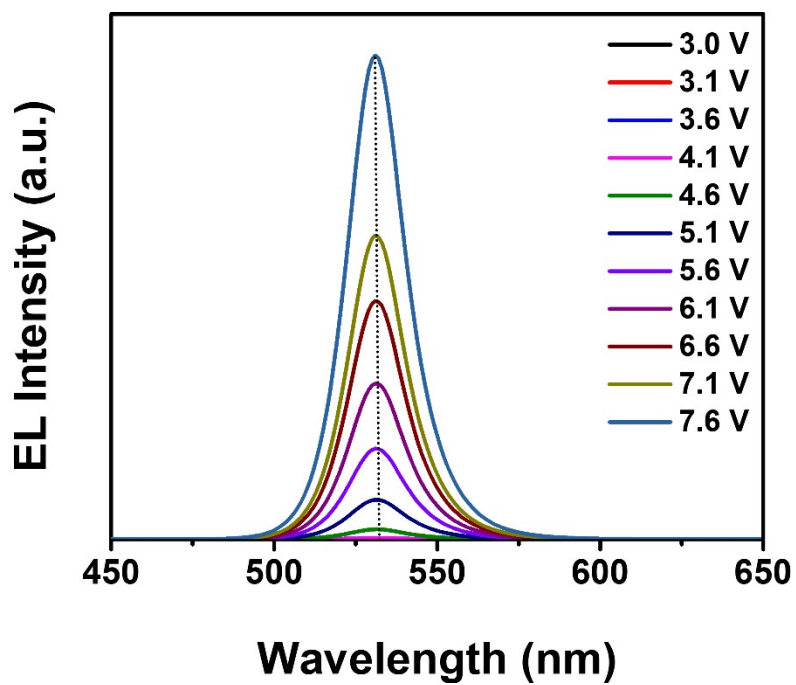

Fig. S11 EL spectra vs. different applied voltage of PeLEDs.

**Table S1.** PL decay Lifetimes of pristine and BPA-passivated NC films

| FAPbBr <sub>3</sub> NCs | A <sub>1</sub> | τ <sub>1</sub> (ns) | A <sub>2</sub> | τ <sub>2</sub> (ns) | τ <sub>avg.</sub> (ns) |
|-------------------------|----------------|---------------------|----------------|---------------------|------------------------|
| Pristine                | 0.4            | 5                   | 0.3            | 5.12                | 5                      |
| BPA-passivated          | 0.9            | 7.8                 | 0.8            | 3.8                 | 7                      |

**Table S2.** PLQY vs. storage lifetimes of pristine and BPA-passivated NCs.

| PLQY                                                                   | Pristine | 0.5 mg BPA | 1 mg BPA | 2 mg BPA |
|------------------------------------------------------------------------|----------|------------|----------|----------|
| 0 Day                                                                  | 77%      | 86%        | 90%      | 83%      |
| 14 Day                                                                 | 55%      | 74%        | 80%      | 71%      |
| Retain Factor ( $R$ ) = $\frac{Final Value}{Initial Value} \times 100$ | 71.1%    | 86.0%      | 88.9%    | 85.5%    |

**Table S3.** A comparative table of reported LEDs mainly based on green perovskite NCs or QDs prepared at room temperature.

| Perovskite LED                                            | EL Peak (nm) | CE (cd/A) | EQE (%) | Lum. (cd/m <sup>2</sup> ) | Ref.      |
|-----------------------------------------------------------|--------------|-----------|---------|---------------------------|-----------|
| FAPbBr <sub>3</sub> -CdSe/ZnS                             | 526          | 31        | 7.1     | 86670                     | 1         |
| FA <sub>0.9</sub> GA <sub>0.1</sub> PbBr <sub>3</sub> NPs | 535          | 91.11     | 20.48   | 6179                      | 2         |
| FAPb <sub>0.7</sub> Sn <sub>0.3</sub> Br <sub>3</sub>     | 528          | 53.5      | 12.9    | 10520                     | 3         |
| FA <sub>0.8</sub> Cs <sub>0.2</sub> PbBr <sub>3</sub>     | 532          | 15.49     | 3.59    | 9459                      | 4         |
| Cu <sub>2</sub> ZnSnS <sub>4</sub> /FAPbBr <sub>3</sub>   | 529          | -         | 7.59    | 27000                     | 5         |
| CsPbBr <sub>3</sub>                                       | 513          | 46.18     | 12.17   | 9464                      | 6         |
| CsPbBr <sub>3</sub>                                       | 516          | -         | 15.1    | 5946                      | 7         |
| CsPbBr <sub>3</sub>                                       | 512          | 21.1      | 6.43    | 96392                     | 8         |
| FAPbBr <sub>3</sub>                                       | 536          | 76.8      | 17.1    | 10 <sup>4</sup>           | 9         |
| BPA-passivated FAPbBr <sub>3</sub>                        | 531          | 55.83     | 12.90   | 29280                     | This work |



## References

1. X. Xue, M. Li, Z. Liu, C. Wang, J. Xu, S. Wang, H. Zhang, H. Zhong and W. Ji, *Fundam. Res.*, 2022, DOI: <https://doi.org/10.1016/j.fmre.2022.08.004>.
2. K. Rock Son, Y.-H. Kim, D.-H. Kim, W. Ren, V. Murugadoss and T. Geun Kim, *Appl. Surf. Sci.*, 2022, **575**, 151783.
3. W. Wang, Z. Wu, T. Ye, S. Ding, K. Wang, Z. Peng and X. W. Sun, *J. Mater. Chem. C*, 2021, **9**, 2115-2122.
4. W. Shen, Y. Lu, P. Xia, W. Zhang, Y. Chen, W. Wang, Y. Wu, L. Liu and S. Chen, *Nanoscale*, 2021, **13**, 1791-1799.
5. L. Pan, W. Li, X. Zeng, M. Mu, Q. Wang, Y. Chen, C. Li, S. Yang, L. Dai, L. Tao and W. Yang, *Inorgan. Chem. Front.*, 2024, **11**, 5233-5243.
6. Z. Zeng, Y. Meng, Z. Yang, Y. Ye, Q. Lin, Z. Meng, H. Hong, S. Ye, Z. Cheng, Q. Lan, J. Wang, Y. Chen, H. Zhang, Y. Bai, X. Jiang, B. Liu, J. Hong, T. Guo, F. Li, Y. Chen and Z. Weng, *ACS Appl. Mater. Interf.*, 2024, **16**, 10389-10397.
7. J. Dai, H. Roshan, M. De Franco, L. Goldoni, F. De Boni, J. Xi, F. Yuan, H. Dong, Z. Wu, F. Di Stasio and L. Manna, *ACS Appl. Mater. Interf.*, 2024, **16**, 11627-11636.
8. Y.-Y. Zhao, Y.-F. Liu, Y.-G. Bi, C.-H. Li, Y.-F. Wang, H.-W. Li, Q.-W. Zhang, C. Lv and Y.-Q. Wu, *Org. Electron.*, 2023, **116**, 106775.
9. H. Chen, L. Fan, R. Zhang, C. Bao, H. Zhao, W. Xiang, W. Liu, G. Niu, R. Guo, L. Zhang and L. Wang, *Adv. Opt. Mater.*, 2020, **8**, 1901390.
